# Supplementary material for: Enhancement of Farnesoid X Receptor Inhibits Migration, Adhesion and Angiogenesis through Proteasome Degradation and VEGF Reduction in Bladder Cancers
Source: MDPI journal article supplement (doi:10.3390/ijms23095259), 2022-05-09
Supplement: s1 [file s1]

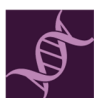

## Supplementary Figures

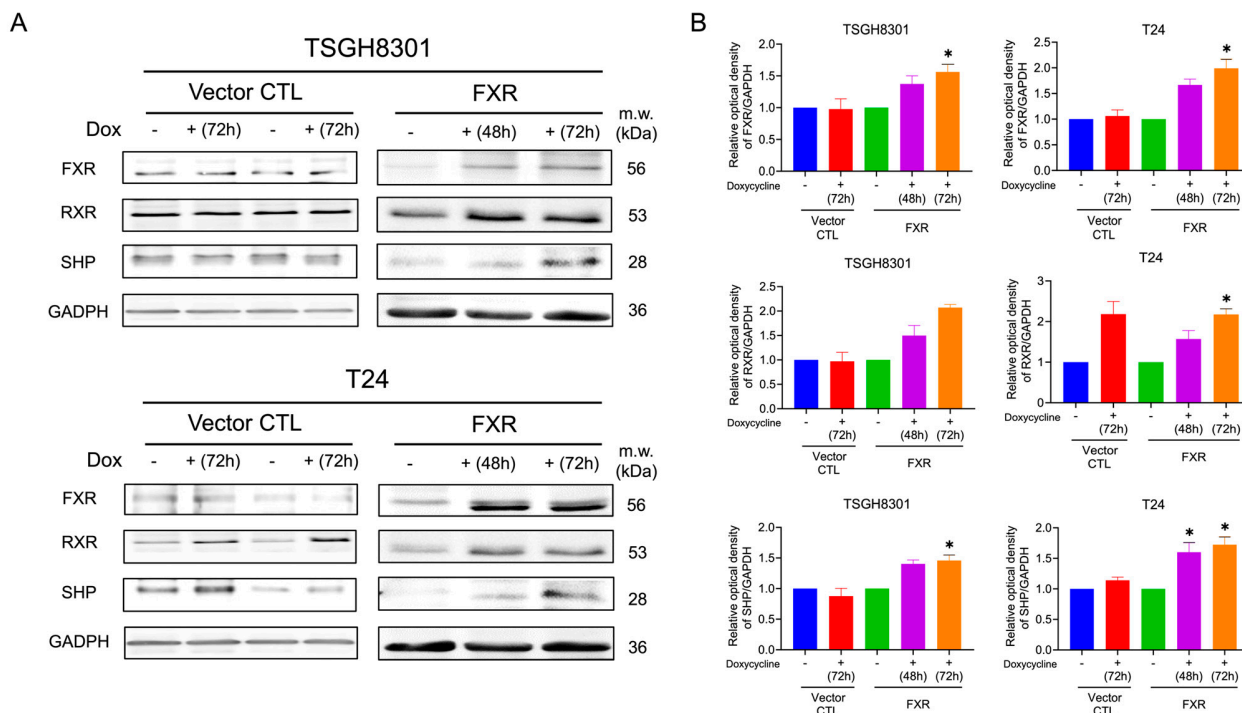

**Supplementary Figure S1.** Inducible FXR overexpression system in human bladder cancer cells TSGH8301 and T24. **(A)** TSGH8301 cells were treated with 1 mg/ml doxycycline for 48 to 72 h and analyzed FXR, retinoid X receptor (RXR) and small heterodimer partner (SHP) protein expressions by western blotting. GAPDH was as a loading control. **(B)** The bar graphs show the relative quantitative analysis of the aforementioned proteins. \*  $p < 0.05$  compared with the control group.

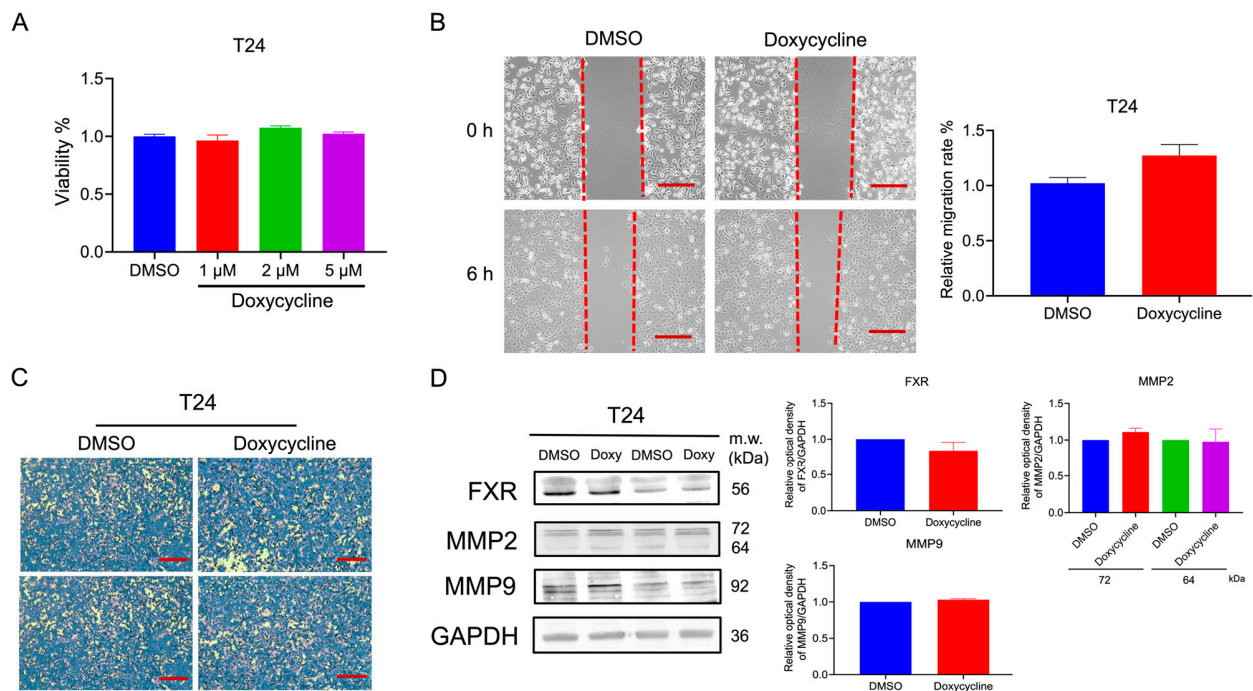

**Supplementary Figure S2.** The effect of doxycycline on cell viability, migration and invasion. **(A)** The cell viability of T24 cells was analyzed after doxycycline treatment for 72 h by MTT assay. **(B)** Wound healing migration assays were performed after doxycycline treatment for 72 h with 6 h scratch. The right panel display the relative rate of the wound healing migratory ability. **(C)** Transwell invasion assays were performed for 16 h incubation in the T24 cells after 72 h doxycycline treatment. The invasive cells were stained and captured. **(D)** The expression of FXR, matrix metalloproteinases-2 (MMP2) and MMP9 were analyzed by Western blotting in the T24 cells. GAPDH was used as the loading control.

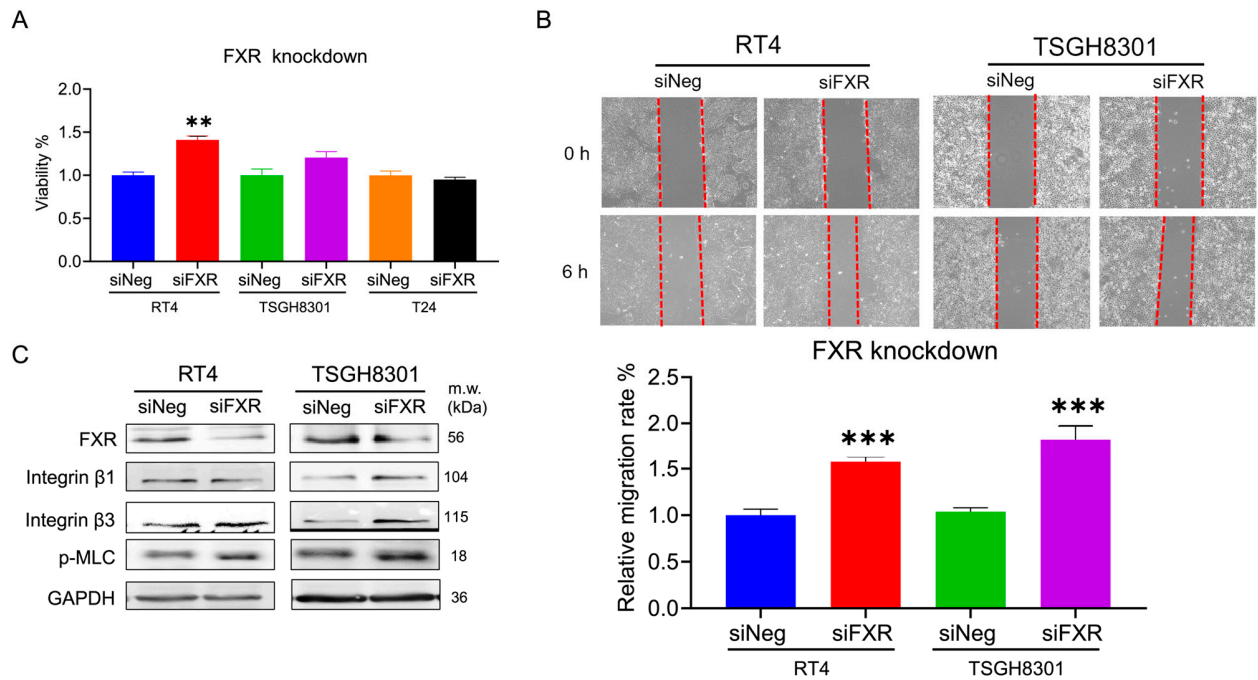

**Supplementary Figure S3.** The effect of FXR knockdown on cell viability and migration. **(A)** The survival rate of RT4, TSGH8301 and T24 cells were analyzed after FXR knockdown for 72 h by MTT assay. **(B)** Wound healing migration assays were performed in FXR knockdown (siFXR) RT4 and T24 human bladder cancer cells after 6 h scratch. The lower panels display the relative rate of the wound healing migratory ability. \*\*\*  $p < 0.001$  compared to the control group. **(C)** FXR, integrin  $\beta$ 1, integrin  $\beta$ 3, and phospho-myosin light chain (p-MLC) were analyzed by Western blotting in the RT4 and T24 cells after FXR knockdown for 72 h. GAPDH was used as the loading control.

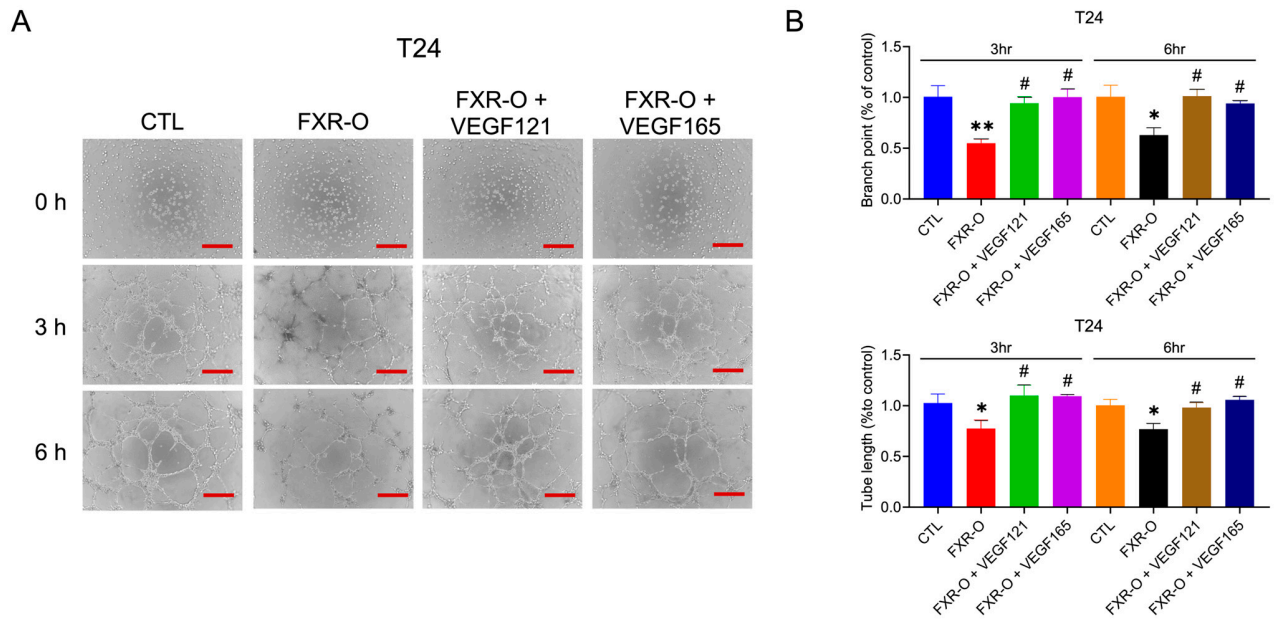

**Supplementary Figure S4.** The effect of VEGFA application on tube formation in FXR overexpression T24 cells. **(A)** Conditioned medium (CM) was collected after 72 h cell culture incubation. Tube formation assay was performed with the addition of VEGFA121 (400 pg/mL) and VEGFA165 (400 pg/mL) in FXR overexpression group. Total length of HUVECs were captured and measured after 6 h incubation. **(B)** The bar graphs show the branch points and tube lengths. \*  $p < 0.05$ ; \*\*  $p < 0.01$  compared with the control group. #  $p < 0.05$  compared with FXR overexpression group. Scale bar = 200  $\mu\text{m}$

**Supplementary Table S1. Primer lists.**

| <b>Name</b>                            | <b>Sequence</b>                   |
|----------------------------------------|-----------------------------------|
| <b>GAPDH-QF</b>                        | <b>CCA CAT CGC TCA GAC ACC AT</b> |
| <b>GAPDH-QR</b>                        | <b>TGA CCA GGC GCC CAA TA</b>     |
| <b>FXR-QF</b>                          | <b>GACTTTGGACCATGAAGACCAG</b>     |
| <b>FXR-QR</b>                          | <b>GCCCAGACGGAAGTTTCTTATT</b>     |
| <b>Integrin <math>\beta</math>1-QF</b> | <b>GTAACCAACCGTAGCAAAGGA</b>      |
| <b>Integrin <math>\beta</math>1-QR</b> | <b>TCCCCTGATCTTAATCGCAAAAC</b>    |
| <b>Integrin <math>\beta</math>3-QF</b> | <b>CATGAAGGATGATCTGTGGAGC</b>     |
| <b>Integrin <math>\beta</math>3-QR</b> | <b>AATCCGCAGGTTACTGGTGAG</b>      |
| <b>VEGFA-QF</b>                        | <b>AGGGCAGAATCATCACGAAGT</b>      |
| <b>VEGFA-QR</b>                        | <b>AGGGTCTCGATTGGATGGCA</b>       |

**Supplementary Table S2. The information of antibody.**

| <b>Name</b>                         | <b>Species</b> | <b>Brand</b>      | <b>Cat NO.</b>   |
|-------------------------------------|----------------|-------------------|------------------|
| <b>GAPDH</b>                        | <b>Rb</b>      | <b>CST</b>        | <b>5174</b>      |
| <b>FXR</b>                          | <b>Ms</b>      | <b>SANTA CRUZ</b> | <b>sc-25309</b>  |
| <b>SHP</b>                          | <b>Ms</b>      | <b>SANTA CRUZ</b> | <b>sc-271511</b> |
| <b>RXR<math>\alpha</math></b>       | <b>Rb</b>      | <b>CST</b>        | <b>3085</b>      |
| <b>p-FAK</b>                        | <b>Ms</b>      | <b>BD</b>         | <b>611723</b>    |
| <b>FAK</b>                          | <b>Rb</b>      | <b>CST</b>        | <b>71433</b>     |
| <b>Integrin <math>\beta</math>1</b> | <b>Rb</b>      | <b>CST</b>        | <b>9661S</b>     |
| <b>Integrin <math>\beta</math>3</b> | <b>Ms</b>      | <b>CST</b>        | <b>9746S</b>     |
| <b>p-MLC</b>                        | <b>Rb</b>      | <b>abcam</b>      | <b>ab200809</b>  |
| <b>MLC</b>                          | <b>Rb</b>      | <b>abcam</b>      | <b>ab92721</b>   |
| <b>MMP2</b>                         | <b>Rb</b>      | <b>CST</b>        | <b>13132</b>     |
| <b>MMP9</b>                         | <b>Rb</b>      | <b>CST</b>        | <b>13667</b>     |
| <b>VEGFA</b>                        | <b>Ms</b>      | <b>abcam</b>      | <b>ab1316</b>    |
| <b>VEGFR1</b>                       | <b>Rb</b>      | <b>abcam</b>      | <b>ab32152</b>   |
| <b>VEGFR2</b>                       | <b>Rb</b>      | <b>CST</b>        | <b>2479S</b>     |
| <b>p-STAT3</b>                      | <b>Ms</b>      | <b>BD</b>         | <b>612542</b>    |
| <b>STAT3</b>                        | <b>Rb</b>      | <b>CST</b>        | <b>4904S</b>     |
| <b>NOS2</b>                         | <b>Ms</b>      | <b>SANTA CRUZ</b> | <b>sc-7271</b>   |
| <b>HIF 1<math>\alpha</math></b>     | <b>Ms</b>      | <b>Novus</b>      | <b>NB100-105</b> |
